# Supplementary material for: Measles Vaccination in the Presence or Absence of Maternal Measles Antibody: Impact on Child Survival
Source: PubMed Central journal article supplement — Clin Infect Dis. 2014 May 14;59(4):484–92. doi: 10.1093/cid/ciu354 (PMC4111916; doi:10.1093/cid/ciu354), 2014-05-14
Supplement: supp_ciu354_ciu354supp.pdf [file supp_ciu354_ciu354supp.pdf]

**Supplementary table 1. Causes of death by verbal autopsy according to maternal antibody level at time of measles vaccination in Trial II<sup>5</sup>**

| Cause of death                         | Undetectable measles antibody level | Had maternal measles antibody |
|----------------------------------------|-------------------------------------|-------------------------------|
| Respiratory infection                  | 3                                   | 1                             |
| Diarrhoea, diarrhoea and vomiting      | 2                                   | 2                             |
| Malaria, fever and anaemia             | 4                                   |                               |
| Traditional ceremony (mongoloid child) | 1                                   |                               |
| No information (family moved)          | 1                                   | 1                             |
|                                        |                                     |                               |
| <b>Total</b>                           | <b>11</b>                           | <b>4</b>                      |

**Supplementary Figure 1: Trial diagrams for the two early two-dose measles vaccination trials.**

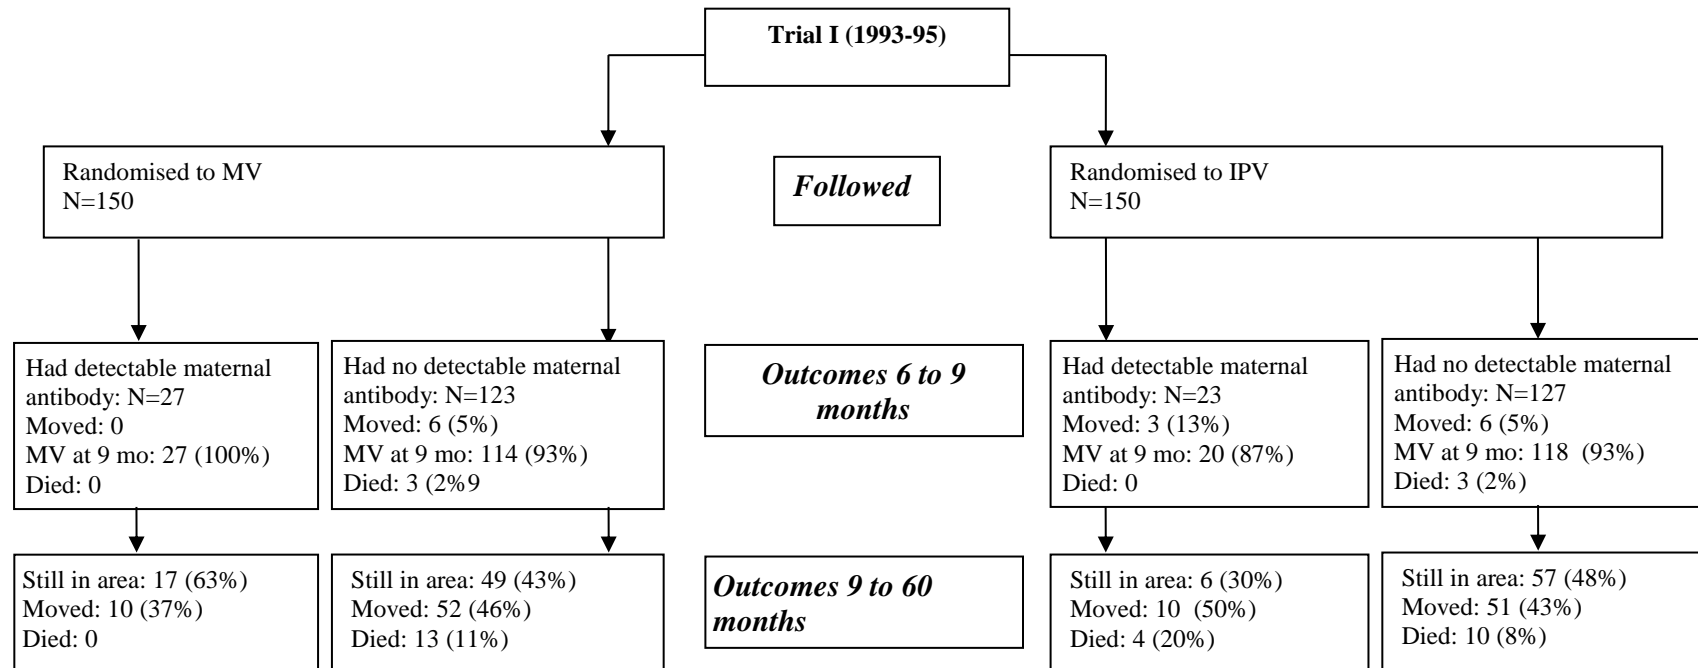

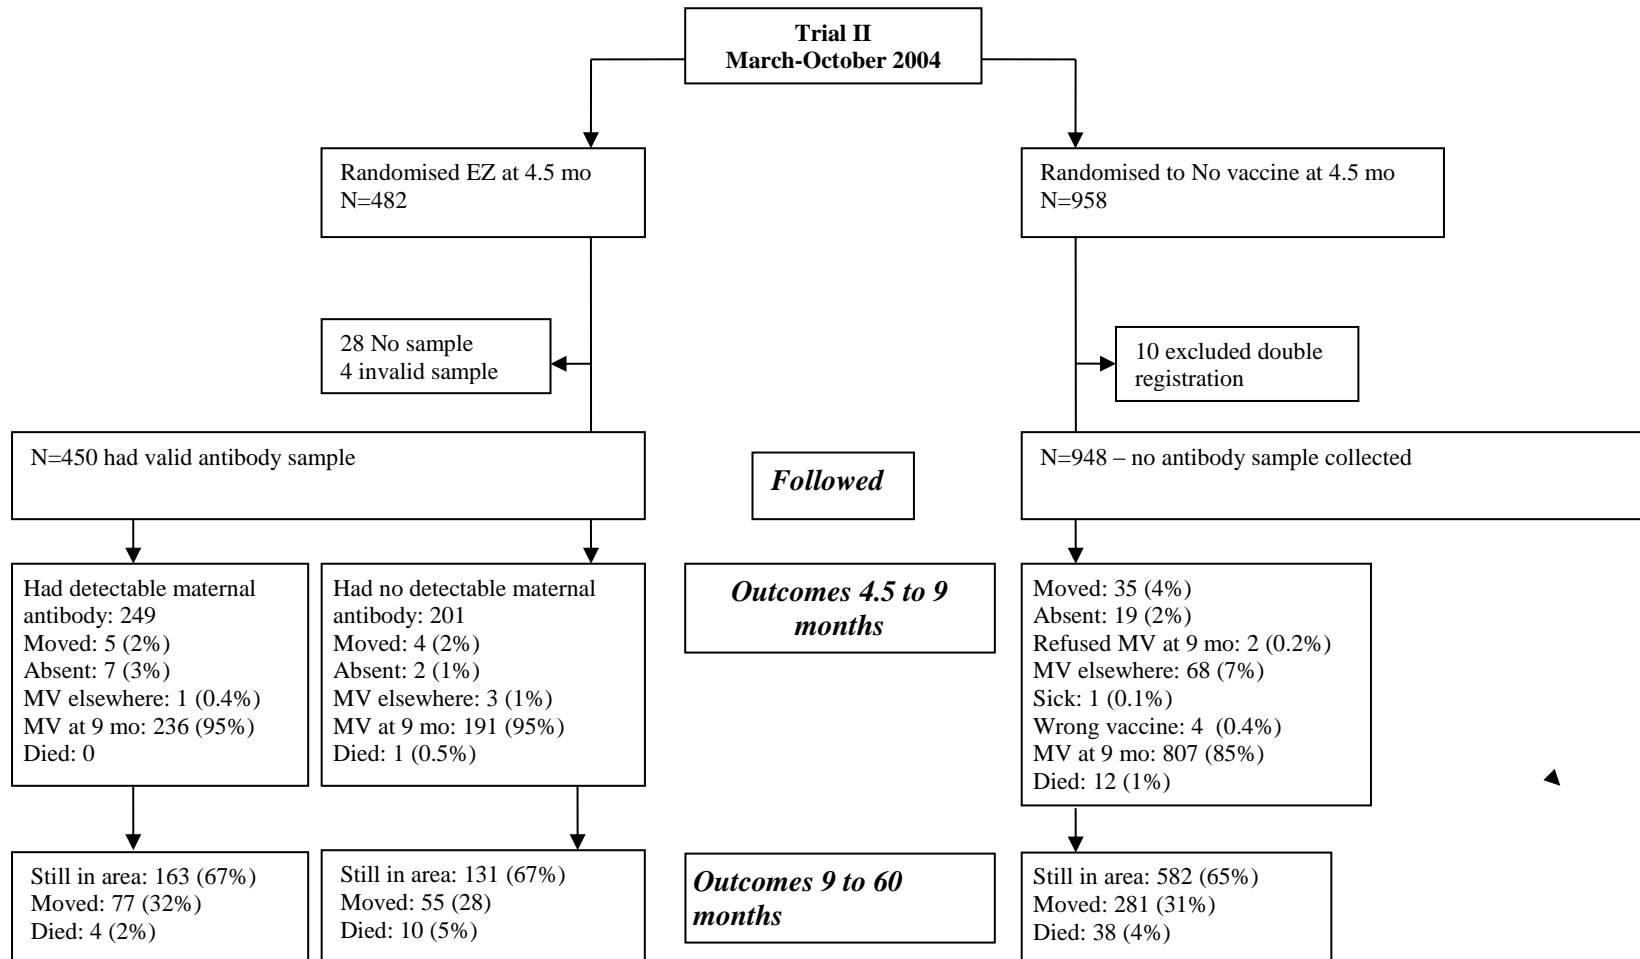

**Notes: MV=measles vaccine; mo=month**
